# Supplementary material for: EVD Dualdating Based Online Subspace Learning
Source: Hindawi journal article supplement (doi:10.1155/2014/429451), 2014-01-01
Supplement: f1 [file 429451.f1.zip]

Archive with 2 entries (2 files):
- EVDD_PCA_Sup.pdf
- mat.429451.v1.pdf
